# Supplementary material for: Osteoglycin promotes meningioma development through downregulation of NF2 and activation of mTOR signaling
Source: PubMed Central journal article supplement (PMC5604305; doi:10.1186/s12964-017-0189-7), 2017-09-18
Supplement: 12964_2017_189_MOESM1_ESM.pdf [file 12964_2017_189_MOESM1_ESM.pdf]

Negative control

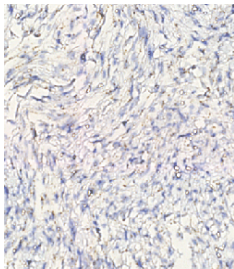

Tonsil
